# Supplementary material
Source: PubMed Central journal article supplement (PMC4618042)
Supplement: NIHMS715050-supplement-Supplemental_Material.pdf [file NIHMS715050-supplement-Supplemental_Material.pdf]

## Supplemental Material

### Supplemental Methods

The research protocol (ARC protocol #2003-063-31) was approved by the UCLA Institutional Animal Care and Use Committee following the guidelines of American Heart Association.

#### *Intact heart optical mapping experiments*

New Zealand White rabbits (4-6 month old) and male Fisher344 rat (3-4 month old) were used in this study. The hearts of the anesthetized rabbits or rats were removed and the ascending aorta was cannulated for retrograde perfusion through the coronary ostia in the Langendorff fashion as we previously described.<sup>1,2</sup> The hearts (N=5) were then stained with RH237 for voltage fluorescent optical imaging as described previously.<sup>3</sup> Cytochalasin D (5  $\mu\text{mol/l}$ ) was added to the perfusate to eliminate motion artifact during optical recordings.<sup>1,2</sup> The stained heart was excited with green light (LED) at 532 nm and the emitted fluorescence was collected using CMOS camera (MiCAM Ultima, BrainVision, Tokyo, Japan) at 1 ms/frame and 100x100 pixels with spatial resolution of 0.35x0.35 mm<sup>2</sup> per pixel covering the entire anterior LV epicardial surface.<sup>3</sup> Extracellular electrograms were recorded continuously using unipolar Ag-AgCl electrodes. Intracellular membrane potential was recorded from epicardial cells using glass microelectrodes.

Hypokalemia was induced by lowering [K] of the Tyrode's solution from 5.4 (mild hyperkalemia) to 4.0 (normal), 3.5 (borderline), 2.7 (moderate), 2.0 (severe) or 1.0 mmol/l (extreme). The following interventions were tested: the Ca channel blocker nifedipine (10

$\mu\text{mol/l}$ ); reduced extracellular Ca concentration ( $[\text{Ca}_o]$ ) from 1.8 mmol/l to 0.9 mmol/l; the CaMKII inhibitor KN-93 (1  $\mu\text{mol/l}$ ) and its inactive form KN-92 (1  $\mu\text{mol/l}$ ); and the selective late  $I_{\text{Na}}$  blocker GS-967 (1  $\mu\text{mol/l}$ ) generously provided by Gilead Sciences.

#### *Isolated ventricular myocyte patch clamp studies*

Young adult (3- to 4-month-old) New Zealand white male rabbits (1.7-2.0 kg) were injected intravenously once with heparin sulfate (1,000 U) and sodium pentobarbital (100 mg/kg). Following confirmation of adequate anesthesia (absence of pedal withdrawal reflex, corneal reflex, and motor response to pain stimuli by scalpel tip), hearts were rapidly excised and perfused for myocyte isolation.

Freshly isolated single ventricular myocytes were used within 8 hours for whole-cell patch clamp studies as described previously<sup>4</sup>. The pipette solution contained (in mmol/l) K-aspartate 110, KCl 30, NaCl 5, HEPES 10, EGTA 0.0-0.1, MgATP 5, creatine phosphate 5, and cAMP 0.1 (pH 7.2 adjusted with KOH). Cells were superfused at 37°C with standard Tyrode's solution containing (in mmol/l) NaCl 136, KCl 5.4 (reduced in hypokalemia experiments),  $\text{NaH}_2\text{PO}_4$  0.33,  $\text{CaCl}_2$  1.8,  $\text{MgCl}_2$  1, HEPES 10, and glucose 10 (pH 7.4 adjusted with NaOH) unless otherwise indicated. Corrections were made for liquid junction potentials. Action potentials were elicited in the current clamp mode at a pacing cycle length (PCL) of 1 or 6 s by 2-ms current pulses of at least twice threshold. Data were acquired and filtered at 2 kHz (Axopatch 200B patch-clamp amplifier; Digidata 1200 acquisition board; and Clampex 8.0, Axon Instruments, Inc.) then analyzed using Clampfit 9.2 (Axon instruments, Inc.) and Origin 7.5 (Microcal Software, Inc.). To induce EADs,  $[\text{K}]_o$  was reduced from 5.4 to  $<3.5$  mmol/l. To inhibit CaMKII, KN-93 (or KN-92 as control) was added to the superfusate, or CaMKII inhibitor

peptide AIP (2  $\mu$ M) was added to the patch electrode solution and allowed to equilibrate for 20-30 mins after rupturing the patch before experimental intervention. To selectively block late  $I_{Na}$ , GS-967 (1  $\mu$ mol/l) was added to the superfusate.

### *CaMKII assay*

After an equilibration period of 10-15 min with standard Tyrode's solution containing 5.4 mmol/l [K], isolated rabbit hearts were perfused for an additional 30 min with either 5.4 or 2.7 mmol/l [K]. Left ventricular tissue was then fast frozen in liquid nitrogen and stored at  $-80^{\circ}\text{C}$ . Protein lysates were prepared in RIPA cell lysis buffer (Thermo Scientific) supplemented with protease inhibitor (Cell Signaling). Supernatants were collected after centrifugation (14,000g) for 20 minutes at  $4^{\circ}\text{C}$  and used for CaMKII activity measurement. CycLex CaMKII assay kit (MBL International, Woburn, MA, USA) was used to determine CaMKII activity by loading 1.0  $\mu$ g protein in each well with a reaction mixture without (to measure basal autophosphorylated activity) or with saturating Ca/CaM (to measure maximal activity) and incubated for 7 mins at  $30^{\circ}\text{C}$ . After washing, 100  $\mu$ l of HRP-conjugated detection antibody was incubated for 60 min at room temperature. After additional washes, 100  $\mu$ l of substrate reagent was added for a 5 min incubation at room temperature following by 100  $\mu$ l of stop solution. Serial dilutions of a purified CaMKII positive control (CycLex Co Ltd) was used for standard curve preparation. Results are reported as the ratio of basal (autophosphorylated) CaMKII activity (in the absence of added Ca/CaM) to maximal CaMKII activity (in the presence of Ca/CaM).

## Computer modeling

Simulations were carried out using a rabbit ventricular myocyte AP model <sup>5</sup>, with the following governing equation for voltage (V):

$$C_m \frac{dV}{dt} = -I_{ion} + I_{sti},$$

where  $C_m = 1 \mu\text{F}/\text{cm}^2$ ,  $I_{ion} = I_{Na} + I_{to,f} + I_{to,s} + I_{Ca,L} + I_{Ks} + I_{Kr} + I_{K1} + I_{NCX} + I_{NaK}$ , where  $I_{ion}$  is the total ionic current density, and  $I_{sti}$  is the stimulation current density. This model has been previously used to study Ca waves, alternans and afterdepolarizations <sup>6-9</sup>. In order to simulate the downstream effects of CaMKII activation on  $I_{Ca,L}$  and  $I_{Na}$ , we allowed the L-type Ca current conductance,  $g_{Ca,L}$ , and late  $I_{Na}$  <sup>10</sup> to increase as the mean cytoplasmic free Ca ( $c_i$ ) increased, according to the following relationships:

$$g_{Ca,L} \rightarrow g_{Ca,L} (1 + 0.5f(c_i))$$

$$h, j \rightarrow (0.02 + 0.1f(c_i)) + (1 - (0.02 + 0.1f(c_i)))h, j$$

Here  $f(c_i) = \frac{1}{1 + \left(\frac{0.1}{CaMK_{trap}(c_i) + CaMK_{bound}(c_i)}\right)^{0.5}}$ , and  $h$  and  $j$  are the linear gating variables for  $I_{Na}$ .

CaMKII activation process is controlled by the following ODEs:

$$CaMK_{bound} = CaMK_0 (1 - CaMK_{trap}) \frac{1}{1 + \left(\frac{K_{m,CaM}}{c_i}\right)^5}$$

$$\frac{dCaMK_{trap}}{dt} = \alpha_{CaMK} \cdot CaMK_{bound} \cdot (CaMK_{bound} + CaMK_{trap}) - \beta \cdot CaMK_{trap},$$

$$\alpha_{CaMK} = 0.05 \text{ ms}^{-1}; \beta_{CaMK} = 0.00068 \text{ ms}^{-1}; CaMK_0 = 0.05; K_{m,CaM} = 3 \mu\text{M}.$$

Under these conditions, the CaMKII-induced increases in  $I_{Ca,L}$  saturated at 50% <sup>11</sup>, and late  $I_{Na}$  saturated at 0.8% of the peak  $I_{Na}$  value <sup>12,13</sup>, with a half-maximal activation at  $c_i = 0.35 \mu\text{M}$ .

### *Statistical Analyses*

Data is summarized as the median with 95% confidence intervals (CI). The conventional percentile bootstrap-resampling approach with 10,000 replications was used for estimating 95% CI as well as examining the significant difference between groups (effect size statistics) <sup>3</sup>, with  $P \leq 0.05$  considered significant. Differences in the incidence of VT/VF (dichotomous comparisons) were determined using Fisher's exact test, and differences in tissue CaMKII activity using Wilcoxon rank-sum test.

### **Supplemental Results**

#### *Hypokalemia-induced VT/VF in Langendorff rat hearts is suppressed by nifedipine.*

Consistent with the key role the L-type Ca current ( $I_{Ca,L}$ ) reactivation in EAD formation, blocking  $I_{Ca,L}$  with 10  $\mu\text{mol/l}$  nifedipine eliminated hypokalemia-induced arrhythmias, as illustrated in Fig. S1. In this heart, no episodes of VT/VF occurred during a 90 min exposure to 2.7 mmol/l  $[\text{K}]_o$  in the presence of nifedipine (panel A), but triggered activity developed within 10 min of washing out nifedipine (panels B-D), culminating in VT/VF after 82 min (panel E), which was suppressed by readmitting nifedipine (panel E). Nifedipine had similar effects in three additional hearts.

#### *Hypokalemia-induced VT/VF in Langendorff rat hearts is suppressed by lowering extracellular $[\text{Ca}]$ .*

If CaMKII activation plays a role in EAD-mediated arrhythmias induced by hypokalemia, then lowering extracellular Ca concentration ( $[Ca]_o$ ) might be expected to minimize CaMKII activation by reducing intracellular Ca loading during hypokalemia. To test this possibility, we lowered  $[Ca]_o$  from 1.8 to 0.9 mmol/l during hypokalemia (2.7 mmol/l). In the presence of 0.9 mmol/l  $[Ca]_o$ , hypokalemia failed to induce VF for up to 80 min (Fig. S2). Upon return to 1.8 mmol/l  $[Ca]_o$ , however, VF occurred within 45 min, and was suppressed by lowering  $[Ca]_o$  to 0.9 mmol/l. Similar effects were observed in four hearts.

*Dofetilide sensitization of a rabbit heart to hypokalemia-induced VT/VF.*

A rabbit heart which failed to develop VT/VF after 90 mins of moderate hypokalemia (2.7 mmol/l) subsequently developed VT/VF after dofetilide was added (Fig. S3).

*Role of CaMKII activation in hypokalemia-induced VF in isolated rat hearts*

In 3 out of 4 hearts, treatment with the CaMKII inhibitor KN-93 (1  $\mu$ mol/l) suppressed hypokalemia-induced VF as shown in Fig. S4A. In the fourth heart, short runs of VT and VF persisted even after 90 min of KN-93 perfusion. In two hearts in which hypokalemia-induced VF was suppressed by KN-93, VF occurred within 10 min when KN-93 was replaced with its inactive congener KN-92 (1  $\mu$ mol/l), as shown in Fig. S4B.

**Supplemental Figures S1-S4**

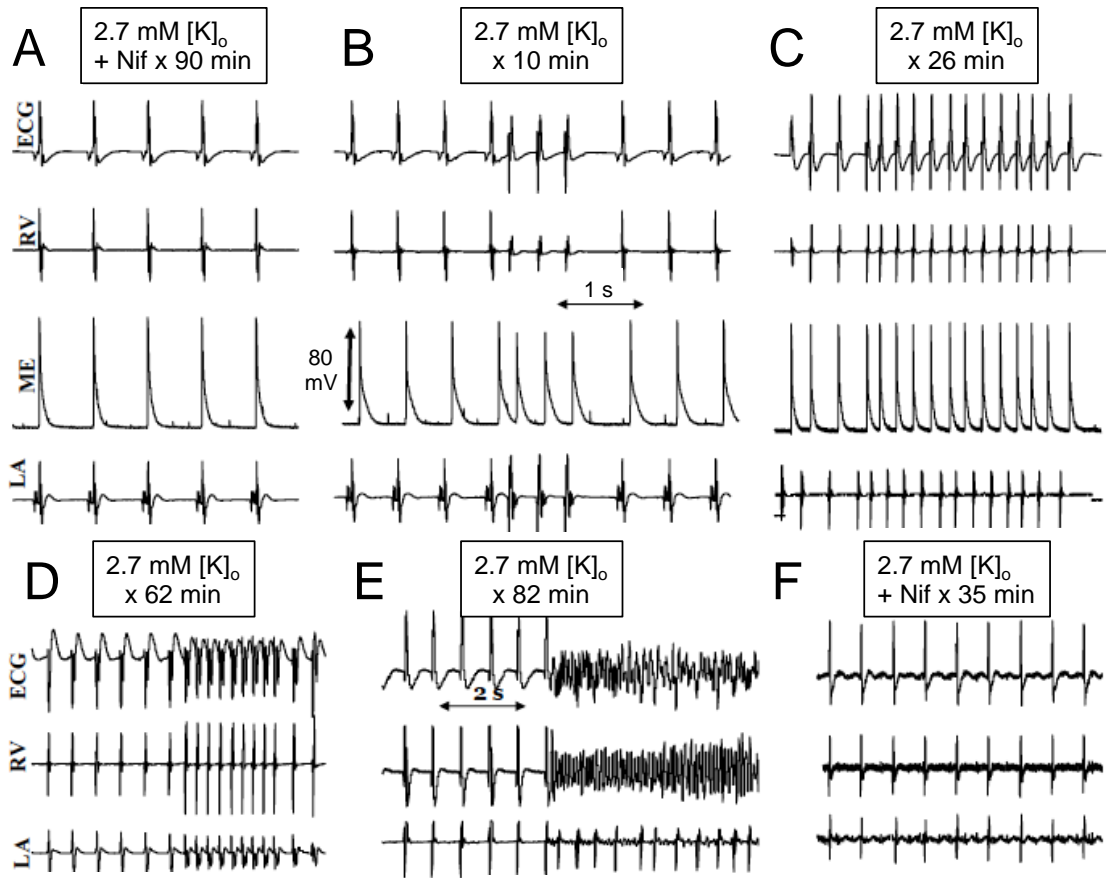

**Figure S1.** Protective and suppressive effect of nifedipine ( $10 \mu\text{mol/l}$ ) against hypokalemia-induced VF in an isolated adult rat heart. **A.** After 90 min of hypokalemia ( $2.7 \text{ mmol/l } [K]_o$ ) in the presence of nifedipine, the heart remains in sinus rhythm as indicated by the pseudo-ECG and bipolar electrograms from the RV and LA. **B-E.** After washout of nifedipine, triggered activity (B, C, D) which culminates in VF (E) after 82 mins. **F.** Reapplication of nifedipine restores sinus rhythm.

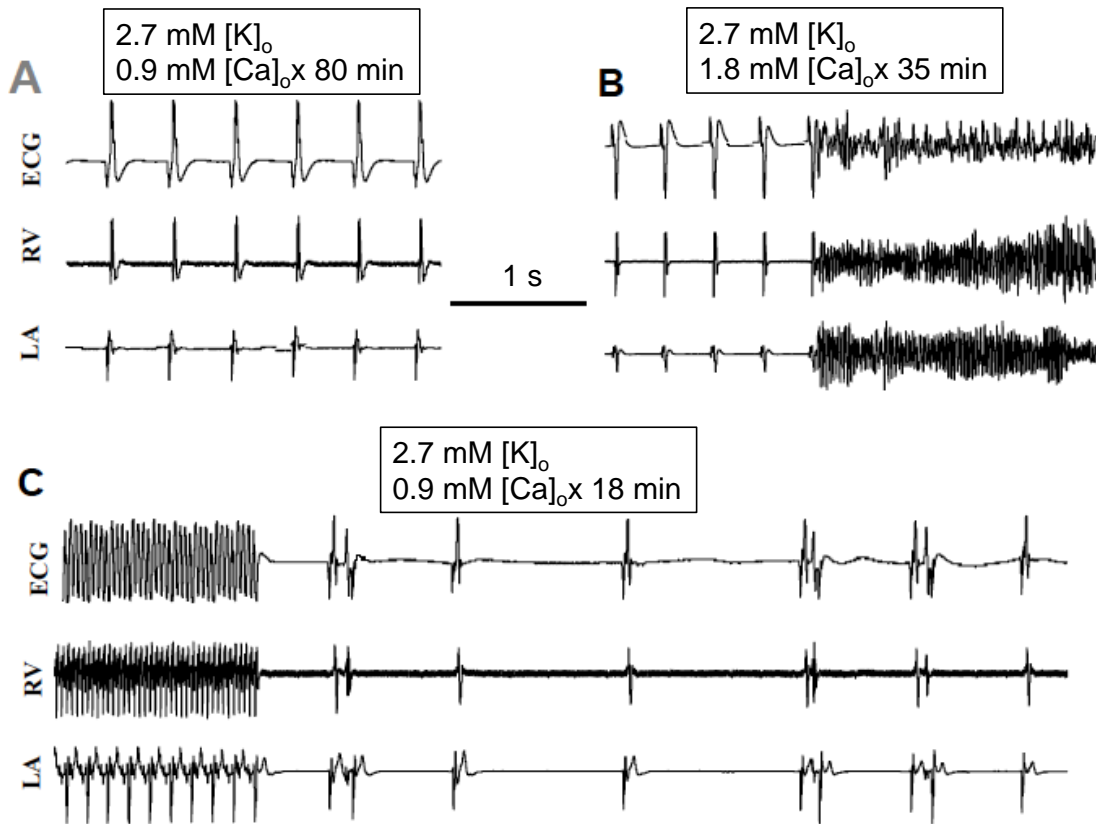

**Figure S2.** *Protective and suppressive effect of hypocalcemia against hypoalemia-induced VF in an isolated-perfused rat heart.* **A.** After 80 min of hypokalemia (2.7 mmol/l  $[K]_o$ ) and hypocalcemia (0.9 mmol/l  $[Ca]_o$ ), the heart remains in sinus rhythm as indicated by the pseudo-ECG and bipolar electrograms from the RV and LA. **B & C.** Restoring  $[Ca]_o$  to 1.8 mmol/l induced VF within 35 minutes (B), which was prevented 18 min after reducing  $[Ca]_o$  to 0.9 mmol/l (C).



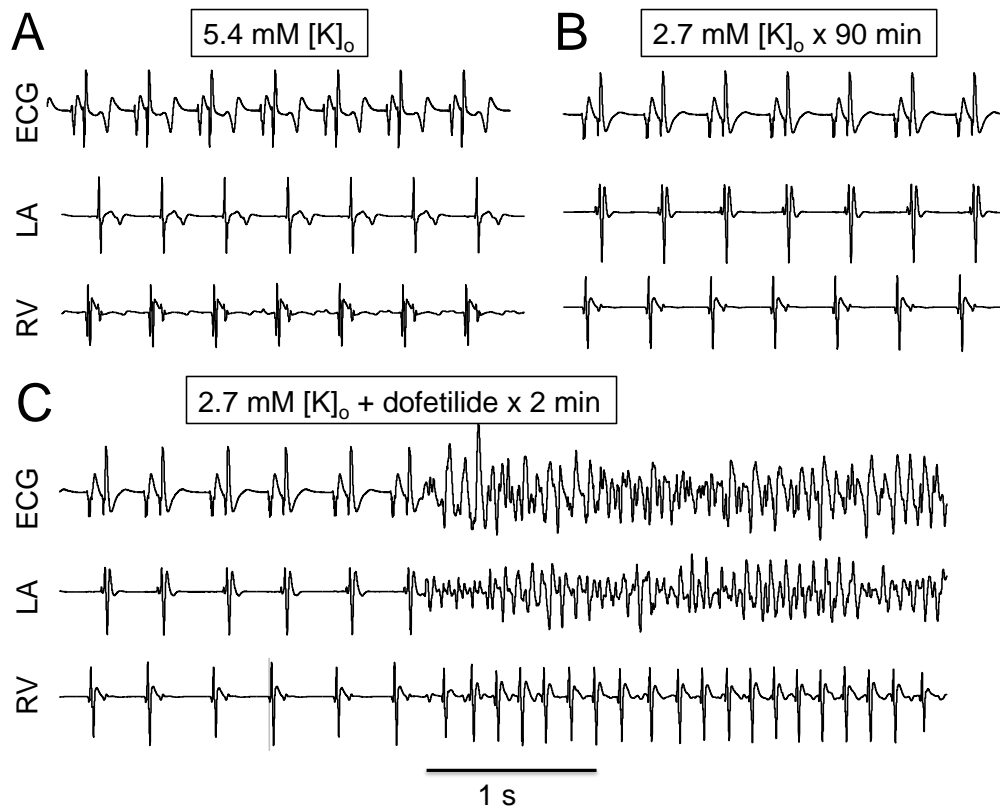

**Figure S3.** *Dofetilide sensitization of a rabbit heart to hypokalemia-induced VT/VF.* A heart in sinus rhythm (A) which failed to develop VT/VF after 90 mins of exposure to 2.7 mmol/l (B), which subsequently developed VT/VF within 2 min after dofetilide was added (C).

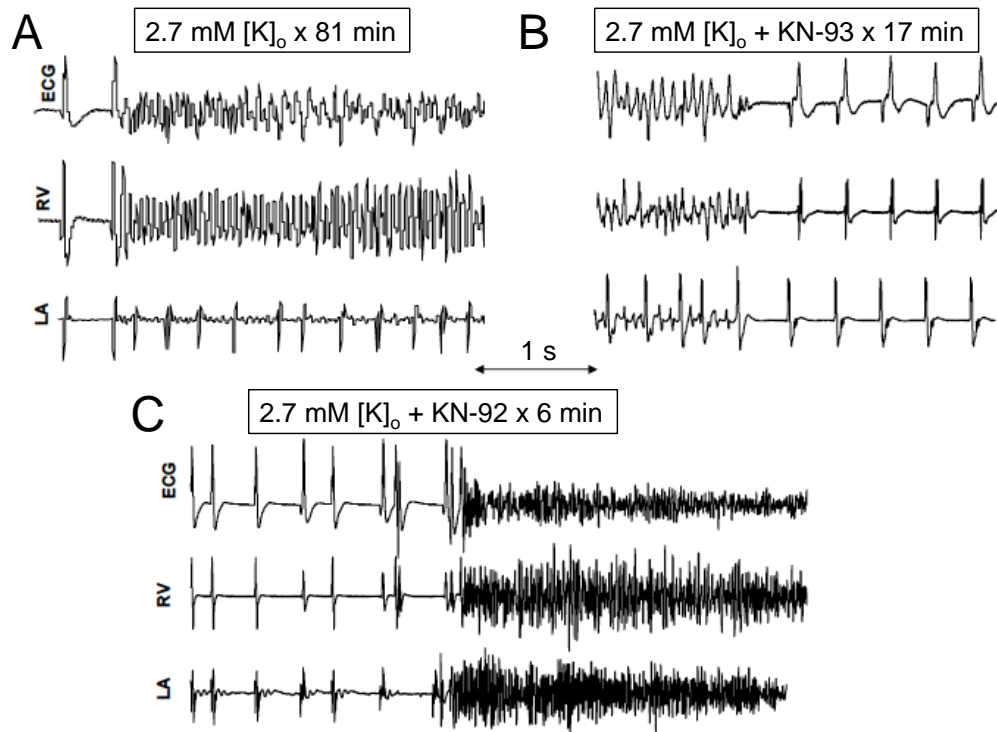

**Figure S4.** *Suppression of hypokalemia-induced VF by the CaMKII blocker*

*KN-93 (1  $\mu\text{mol/l}$ ) but not by its inactive form KN-92 (1  $\mu\text{mol/l}$ ). A.* VT/VF after 81 minutes of hypokalemia (2.7 mmol/l) **B.** KN-93 suppressed VT/VF after 17 min. **C.** Replacing KN-93 with KN-92 led to recurrence of VT/VF after 6 min.

## References

1. Morita N, Sovari AA, Xie Y, Fishbein MC, Mandel WJ, Garfinkel A, Lin S-F, Chen P-S, Xie L-H, Chen F, Qu Z, Weiss JN and Karagueuzian HS. Increased susceptibility of aged hearts to ventricular fibrillation during oxidative stress. *Am J Physiol Heart Circ Physiol*. 2009;297:H1594-1605.
2. Morita N, Lee JH, Xie Y, Sovari A, Qu Z, Weiss JN and Karagueuzian HS. Suppression of re-entrant and multifocal ventricular fibrillation by the late sodium current blocker ranolazine. *J Am Coll Cardiol*. 2011;57:366-375.
3. Bapat A, Nguyen TP, Lee JH, Sovari AA, Fishbein MC, Weiss JN and Karagueuzian HS. Enhanced sensitivity of aged fibrotic hearts to angiotensin II- and hypokalemia-induced early afterdepolarization-mediated ventricular arrhythmias. *Am J Physiol Heart Circ Physiol*. 2012;302:H2331-40.
4. Nguyen TP, Xie Y, Garfinkel A, Qu Z and Weiss JN. Arrhythmogenic consequences of myofibroblast-myocyte coupling. *Cardiovasc Res*. 2012;93:242-51.
5. Restrepo JG, Weiss JN and Karma A. Calsequestrin-mediated mechanism for cellular calcium transient alternans. *Biophys J*. 2008;95:3767-89.
6. Wan X, Cutler M, Song Z, Karma A, Matsuda T, Baba A and Rosenbaum DS. New experimental evidence for mechanism of arrhythmogenic membrane potential alternans based on balance of electrogenic  $I_{NCX}/I_{Ca}$  currents. *Heart Rhythm*. 2012;9:1698-705.
7. Song Z, Ko CY, Nivala M, Weiss JN and Qu Z. Calcium-voltage coupling in the genesis of early and delayed afterdepolarizations in cardiac myocytes. *Biophys J*. 2015;108:1908–1921.

8. Chan YH, Tsai WC, Song Z, Ko CY, Qu Z, Weiss JN, Lin SF, Chen PS, Jones LR and Chen Z. Acute reversal of phospholamban inhibition facilitates the rhythmic whole-cell propagating calcium waves in isolated ventricular myocytes. *J Mol Cell Cardiol.* 2015;80:126-35.
9. Nivala M, Song Z, Weiss JN and Qu Z. T-tubule disruption promotes calcium alternans in failing ventricular myocytes: mechanistic insights from computational modeling. *J Mol Cell Cardiol.* 2015;79:32-41.
10. Zhao Z, Xie Y, Wen H, Xiao D, Allen C, Fefelova N, Dun W, Boyden PA, Qu Z and Xie LH. Role of the transient outward potassium current in the genesis of early afterdepolarizations in cardiac cells. *Cardiovasc Res.* 2012.
11. Anderson ME, Braun AP, Schulman H and Premack BA. Multifunctional Ca<sup>2+</sup>/calmodulin-dependent protein kinase mediates Ca-induced enhancement of the L-type Ca current in rabbit ventricular myocytes. *Circ Res.* 1994;75:854-61.
12. Wagner S, Dybkova N, Rasenack EC, Jacobshagen C, Fabritz L, Kirchhof P, Maier SK, Zhang T, Hasenfuss G, Brown JH, Bers DM and Maier LS. Ca/calmodulin-dependent protein kinase II regulates cardiac Na channels. *J Clin Invest.* 2006;116:3127-38.
13. Wagner S, Ruff HM, Weber SL, Bellmann S, Sowa T, Schulte T, Anderson ME, Grandi E, Bers DM, Backs J, Belardinelli L and Maier LS. Reactive oxygen species-activated Ca/Calmodulin Kinase II $\delta$  is required for late I<sub>Na</sub> augmentation leading to cellular Na and Ca overload. *Circ Res.* 2011;108:555-65.
